# Supplementary material for: Pseudo-Tetrahedral Copper(I) Symmetrical Formamidine Dithiocarbamate-Phosphine Complexes: Antibacterial, Antioxidant and Pharmacokinetics Studies
Source: MDPI journal article supplement (doi:10.3390/inorganics10060079), 2022-06-10
Supplement: s1 [file s1]

# **Pseudo-tetrahedral Copper(I) Symmetrical Formamidine Dithiocarbamate-Phosphine Complexes; Antibacterial, Antioxidant and Pharmacokinetics Studies**

Segun D. Oladipo<sup>a,b</sup>, and Bernard Omondi<sup>\*a</sup>

<sup>a</sup> School of Chemistry and Physics, Westville Campus, University of Kwazulu-Natal, Private Bag X54001, Durban, 4000, South Africa.

<sup>b</sup>Department of Chemical Sciences, Olabisi Onabanjo University, P.M.B 2002, Ago-Iwoye, Nigeria.

\*Corresponding author

E-mail: owaga@ukzn.ac.za Tel: (+27) 332606436

## **Supplementary information**

### Table of contents

| Figures                                                                                            | Page |
|----------------------------------------------------------------------------------------------------|------|
| Figure S1: <sup>1</sup> H-NMR spectrum for L1                                                      | 2    |
| Figure S2: <sup>1</sup> H-NMR spectrum for L2                                                      | 2    |
| Figure S3: <sup>1</sup> H-NMR spectrum for L3                                                      | 3    |
| Figure S4: <sup>1</sup> H-NMR spectrum for 1                                                       | 3    |
| Figure S5: <sup>1</sup> H-NMR spectrum for 2                                                       | 4    |
| Figure S6: <sup>1</sup> H-NMR spectrum for 3                                                       | 4    |
| Figure S7: <sup>13</sup> C-NMR spectrum for L1                                                     | 5    |
| Figure S8: <sup>13</sup> C-NMR spectrum for L2                                                     | 5    |
| Figure S9: <sup>13</sup> C-NMR spectrum for L3                                                     | 6    |
| Figure S10: <sup>13</sup> C-NMR spectrum for 1                                                     | 6    |
| Figure S11: <sup>13</sup> C-NMR spectrum for 2                                                     | 7    |
| Figure S12: <sup>13</sup> C-NMR spectrum for 3                                                     | 7    |
| Figure S13: <sup>31</sup> P-NMR spectrum for 1                                                     | 8    |
| Figure S14: <sup>31</sup> P-NMR spectrum for 2                                                     | 8    |
| Figure S15: <sup>31</sup> P-NMR spectrum for 3                                                     | 9    |
| Figure S16: <sup>31</sup> P-NMR spectrum for [Cu(PPh <sub>3</sub> ) <sub>2</sub> NO <sub>3</sub> ] | 9    |
| Figure S17: IR Spectrum for L1                                                                     | 10   |
| Figure S18: IR Spectrum for L2                                                                     | 10   |
| Figure S19: IR Spectrum for L3                                                                     | 11   |
| Figure S20: IR Spectrum for 1                                                                      | 11   |
| Figure S21: IR Spectrum for 2                                                                      | 12   |
| Figure S22: IR Spectrum for 3                                                                      | 12   |
| Figure S23: Mass Spectrum for 1                                                                    | 13   |
| Figure S24: Mass Spectrum for 2                                                                    | 13   |
| Figure S25: Mass Spectrum for 3                                                                    | 14   |

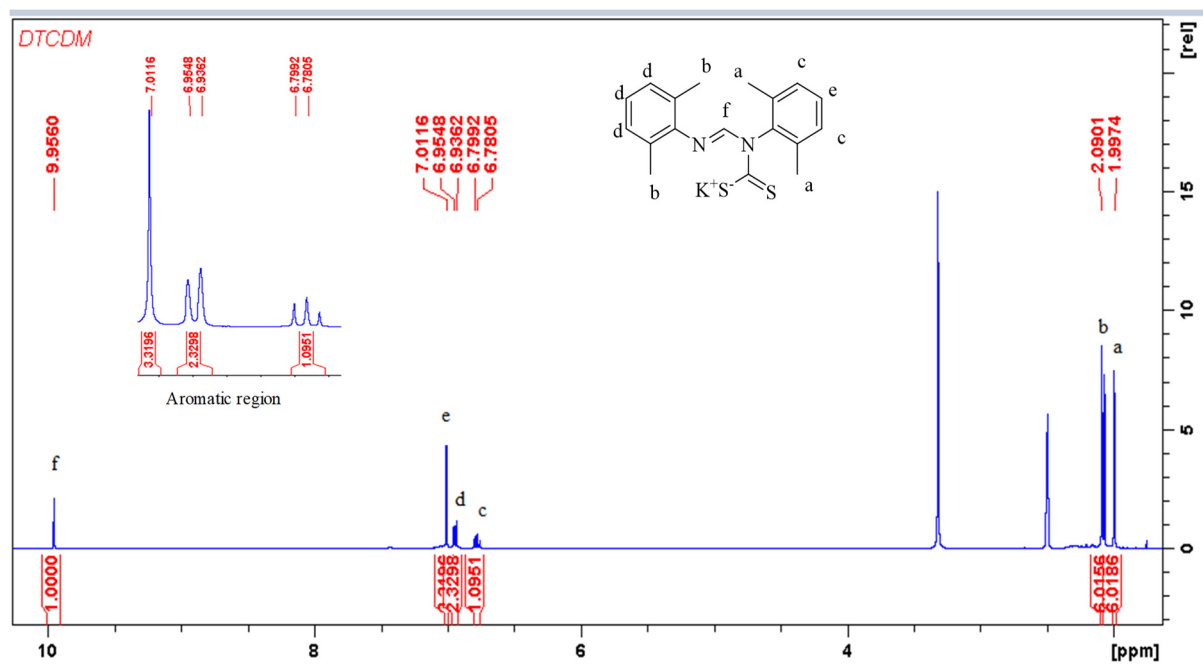

Figure S1:  $^1\text{H}$ -NMR spectrum for L1.

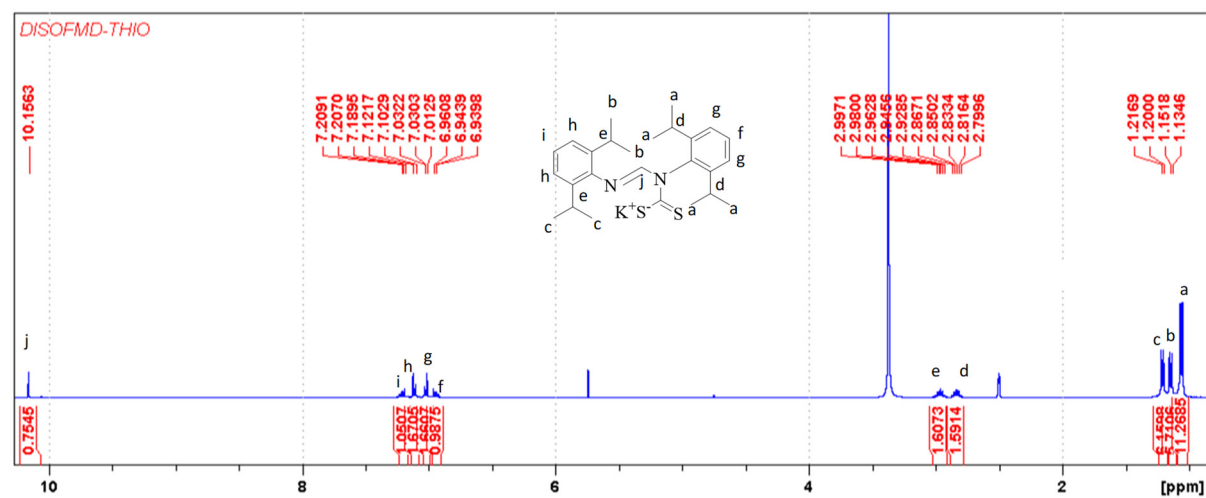

Figure S2:  $^1\text{H}$ -NMR spectrum for L2.

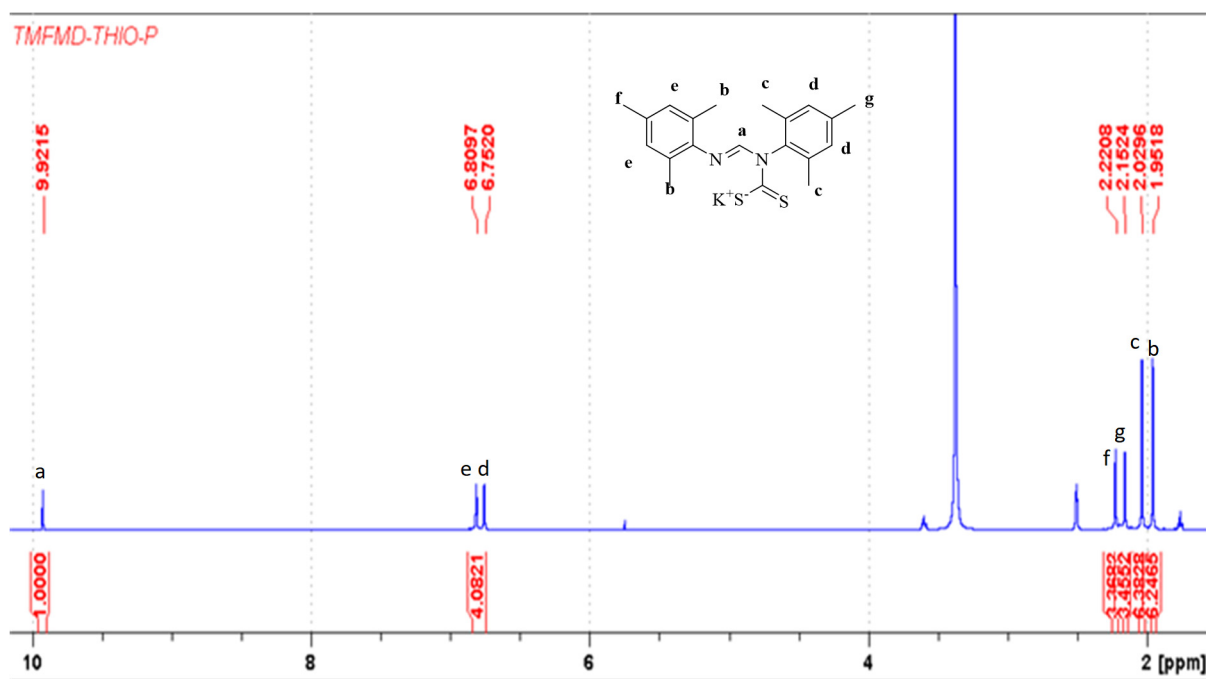

Figure S3:  $^1\text{H}$ -NMR spectrum for L3.

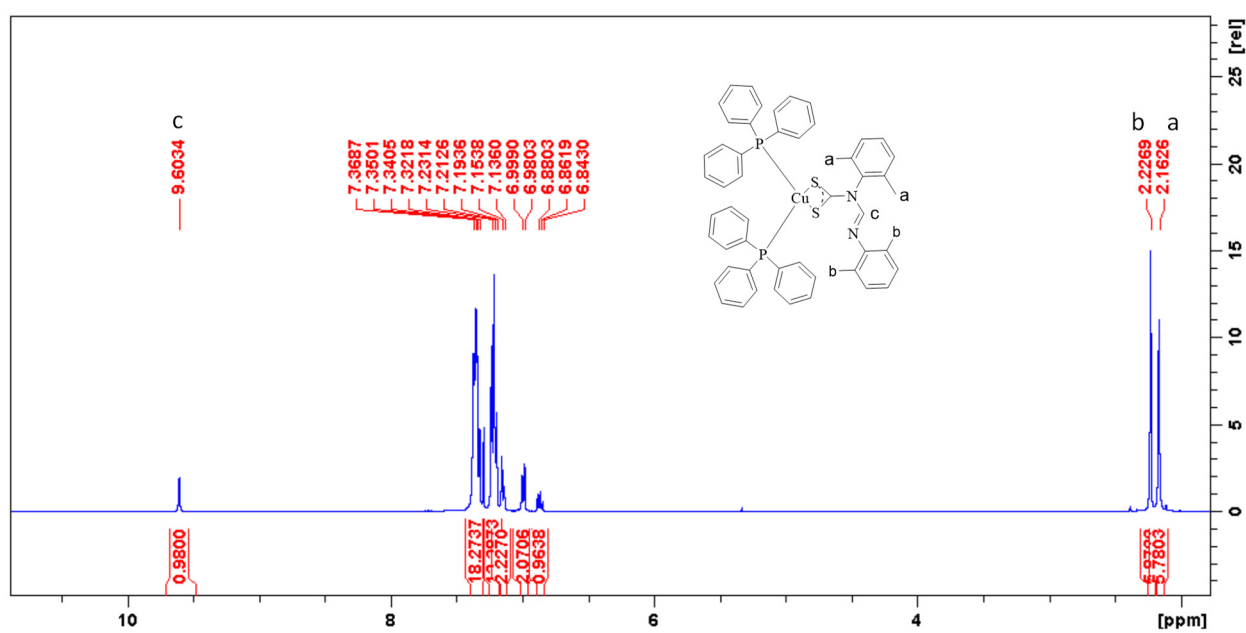

Figure S4:  $^1\text{H}$ -NMR spectrum for 1.

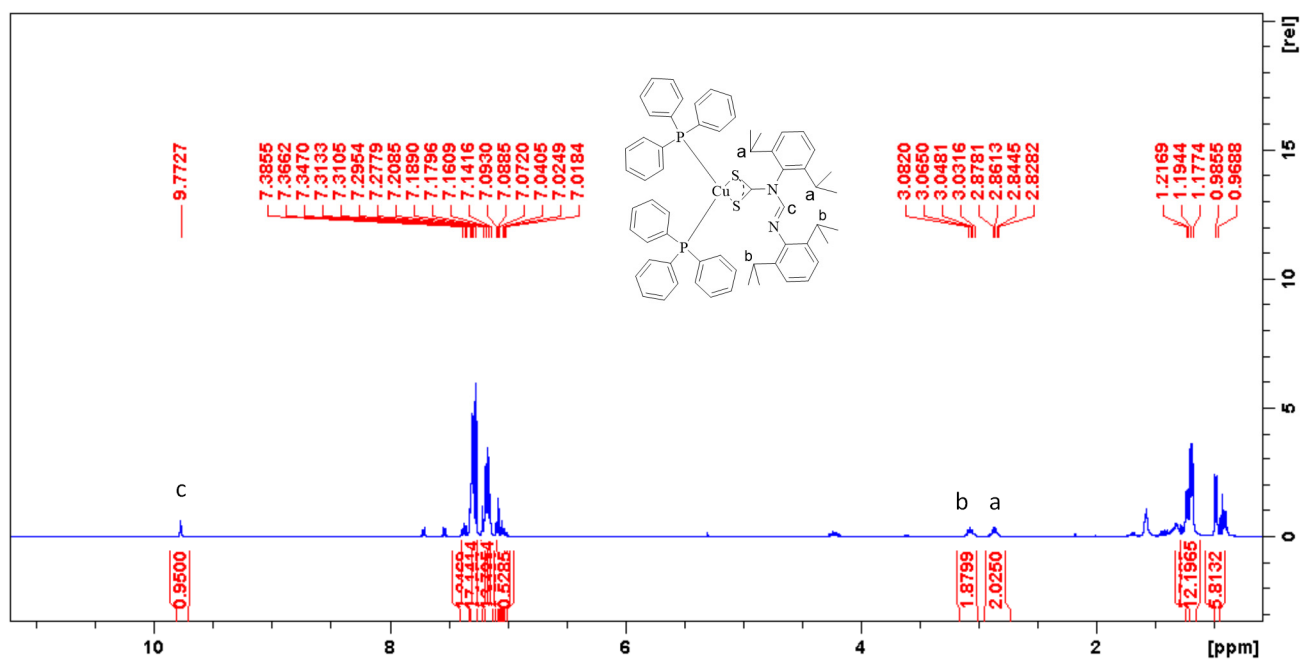

Figure S5:  $^1\text{H}$ -NMR spectrum for 2.

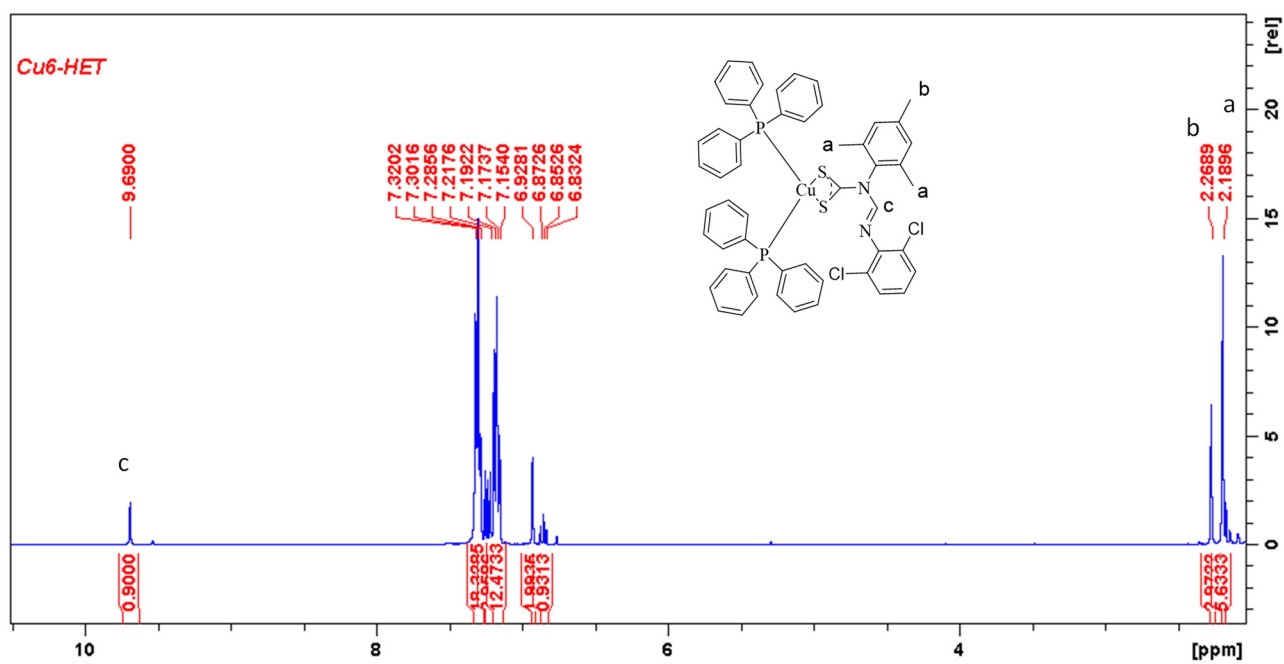

Figure S6:  $^1\text{H}$ -NMR spectrum for 3.

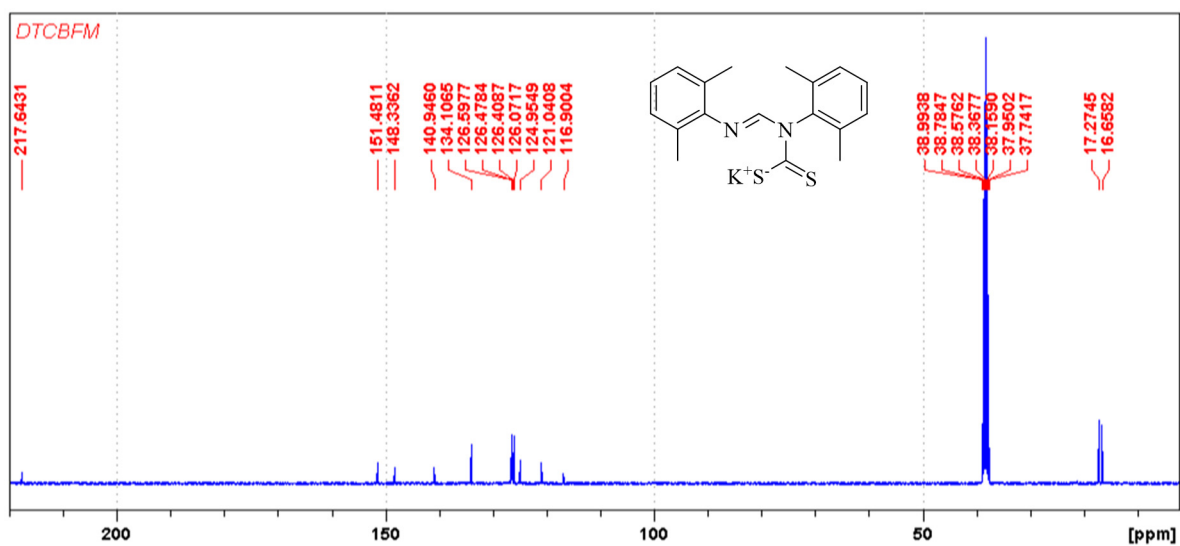

Figure S7: <sup>13</sup>C-NMR spectrum for L1.

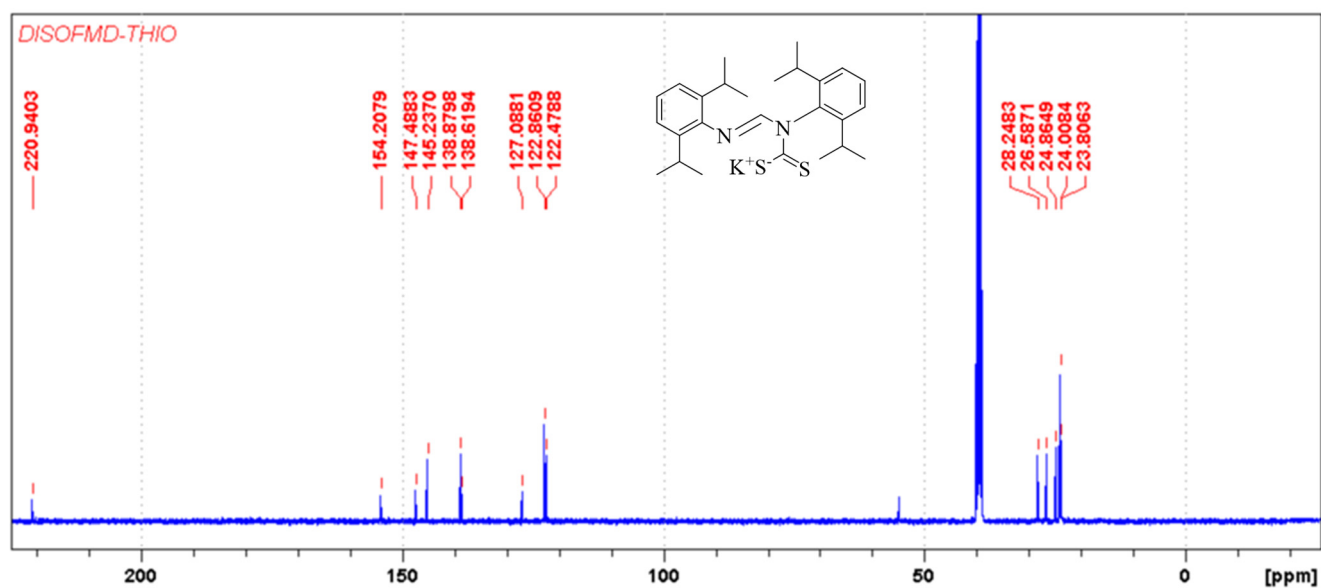

Figure S8: <sup>13</sup>C-NMR spectrum for L2.

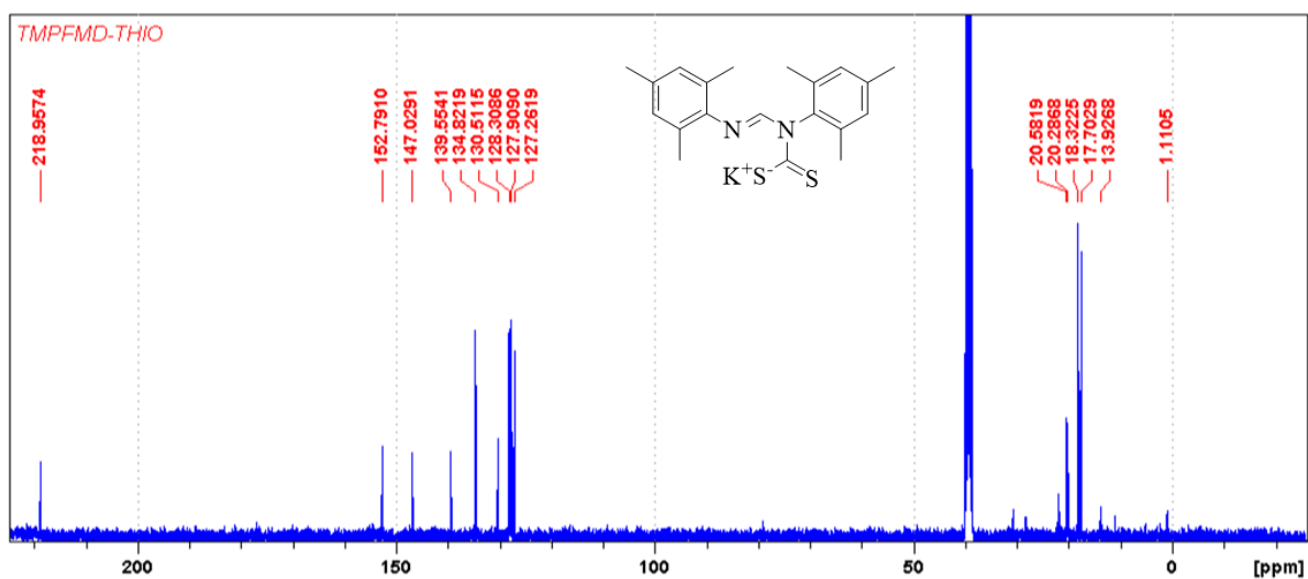

Figure S9:  $^{13}\text{C}$ -NMR spectrum for L3.

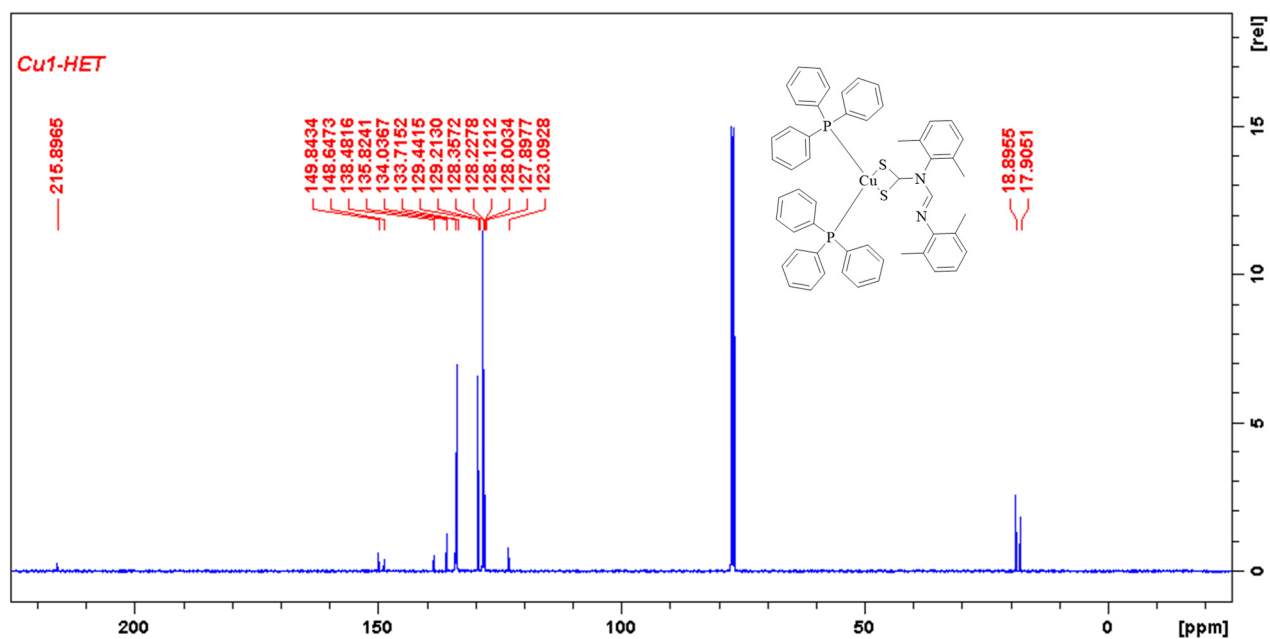

Figure S10:  $^{13}\text{C}$ -NMR spectrum for 1.

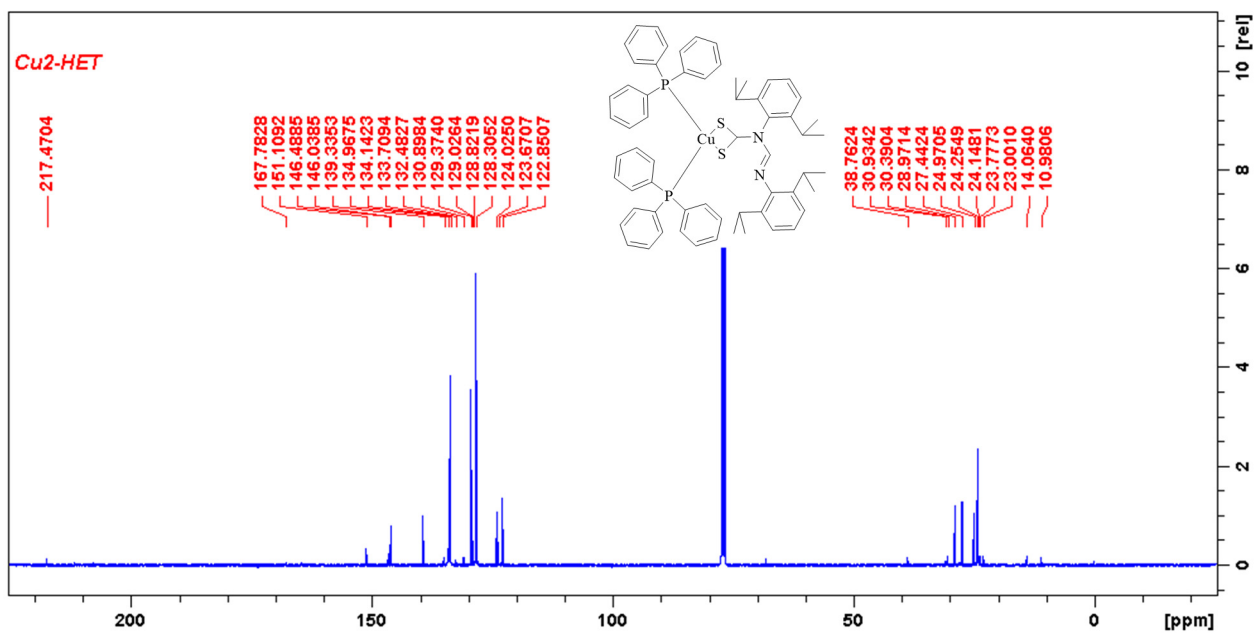

Figure S11:  $^{13}\text{C}$ -NMR spectrum for 2.

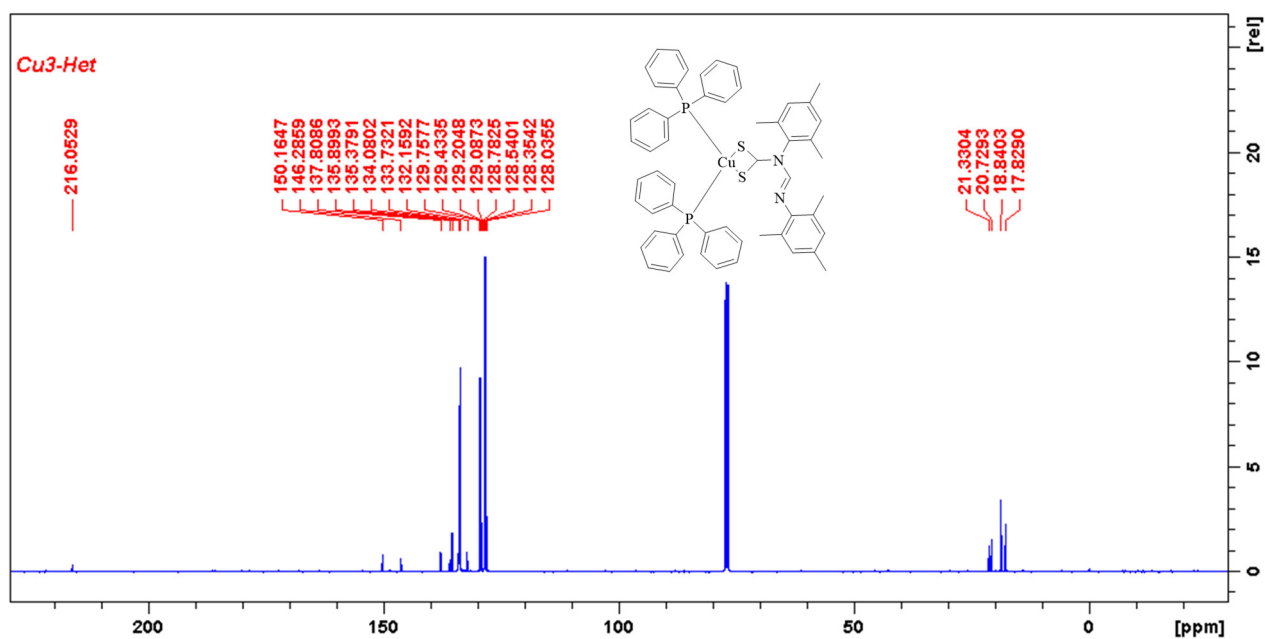

Figure S12:  $^{13}\text{C}$ -NMR spectrum for 3.

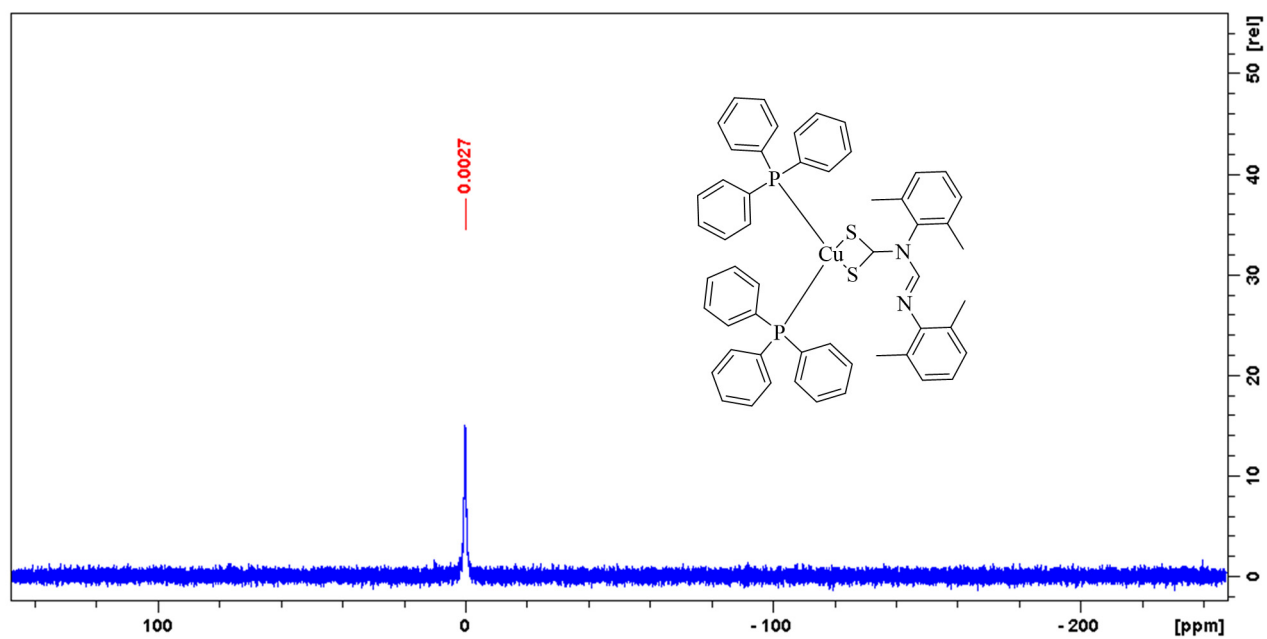

Figure S13:  $^{31}\text{P}$ -NMR spectrum for 1.

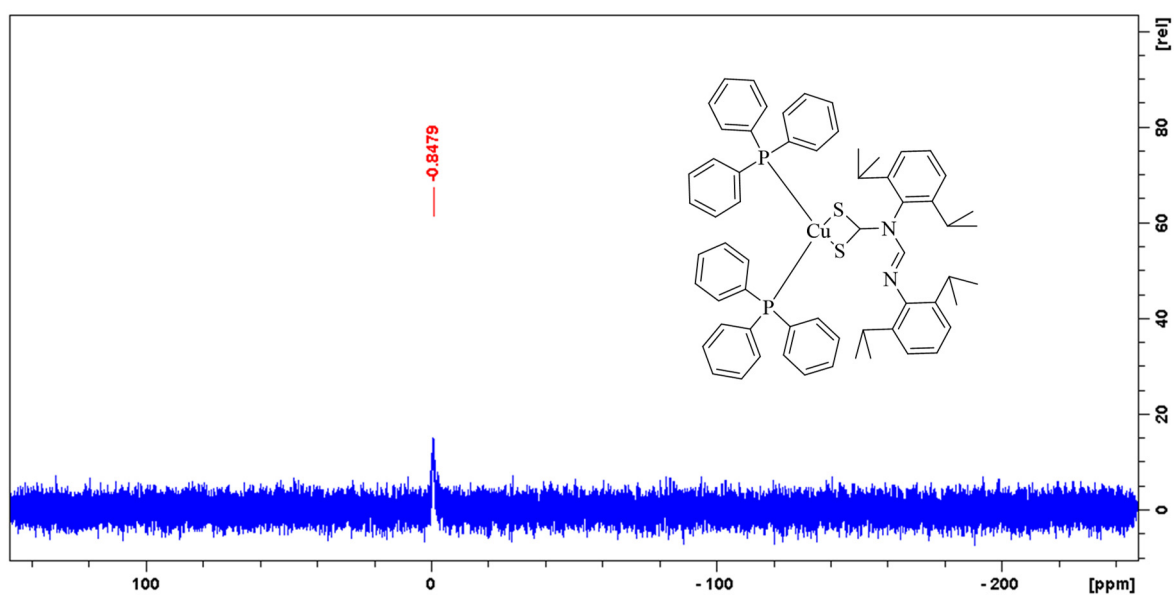

Figure S14:  $^{31}\text{P}$ -NMR spectrum for 2.



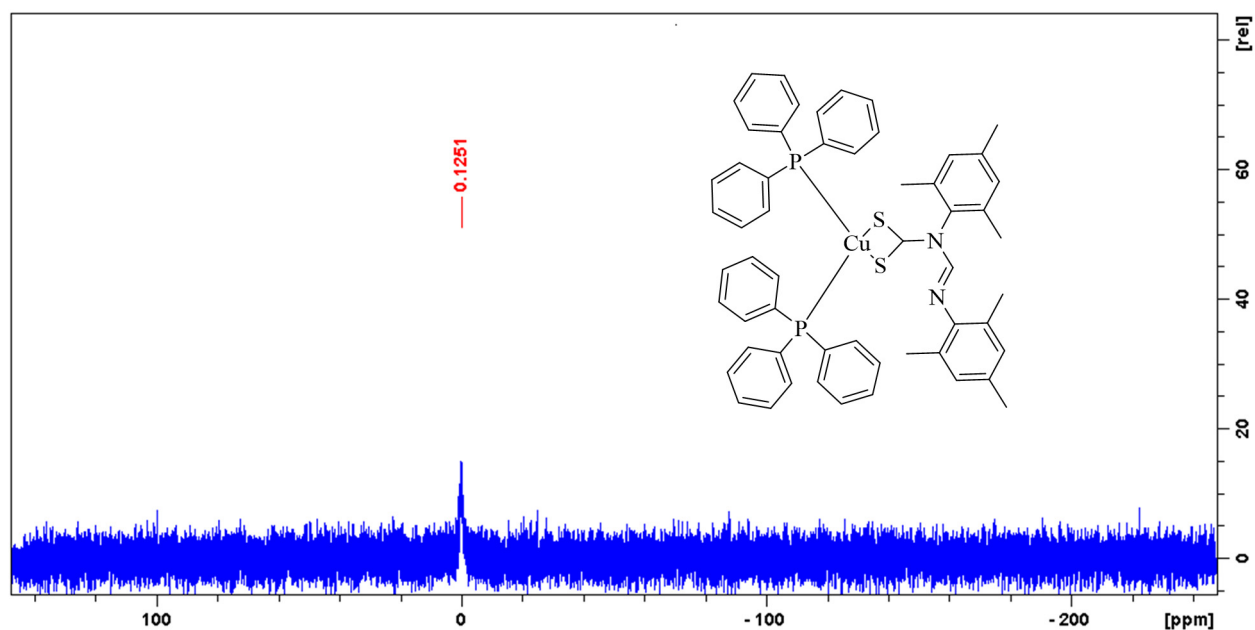

Figure S15:  $^{31}\text{P}$ -NMR spectrum for **3**.

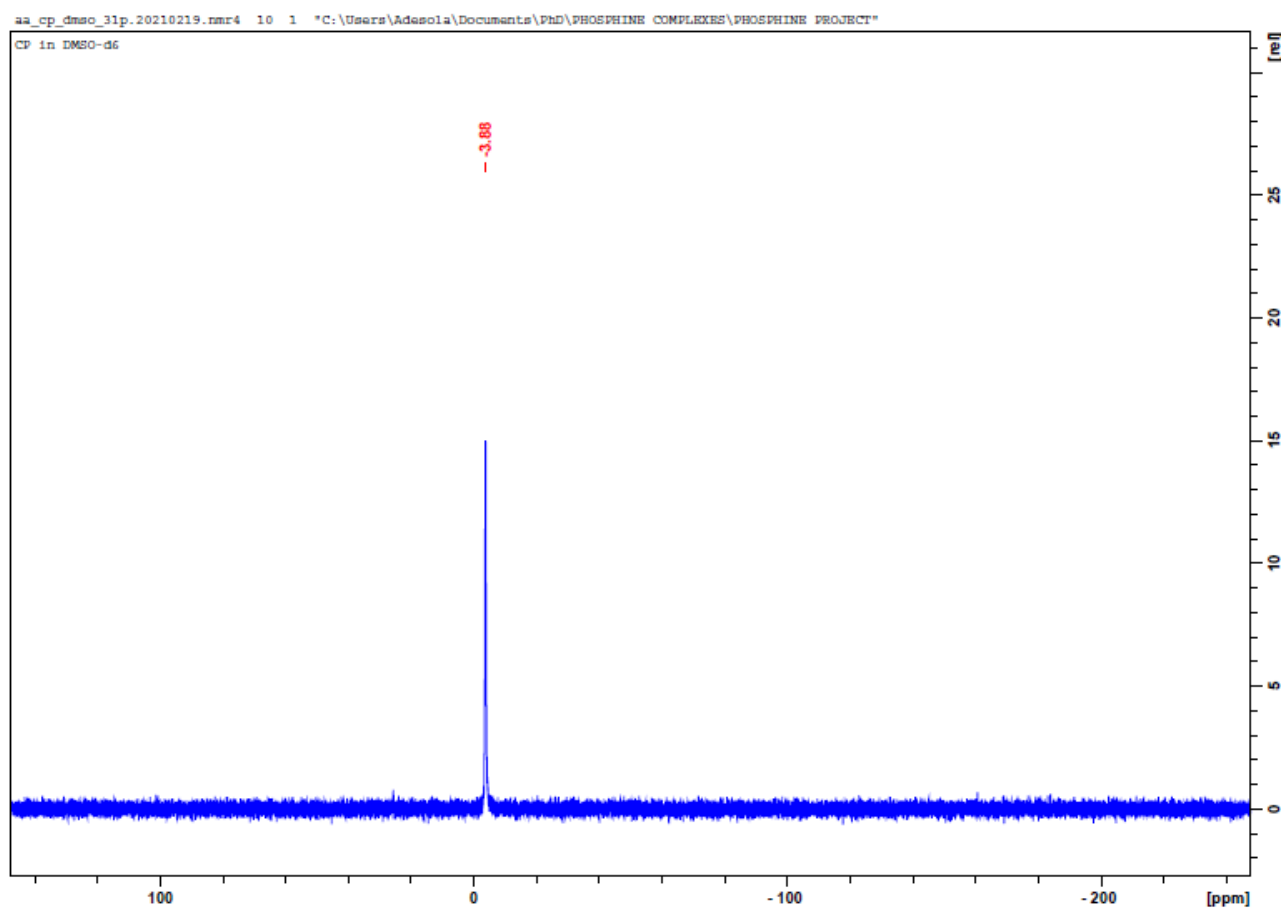

Figure S16:  $^{31}\text{P}$ -NMR spectrum for  $[\text{Cu}(\text{PPh}_3)_2]\text{NO}_3$ .

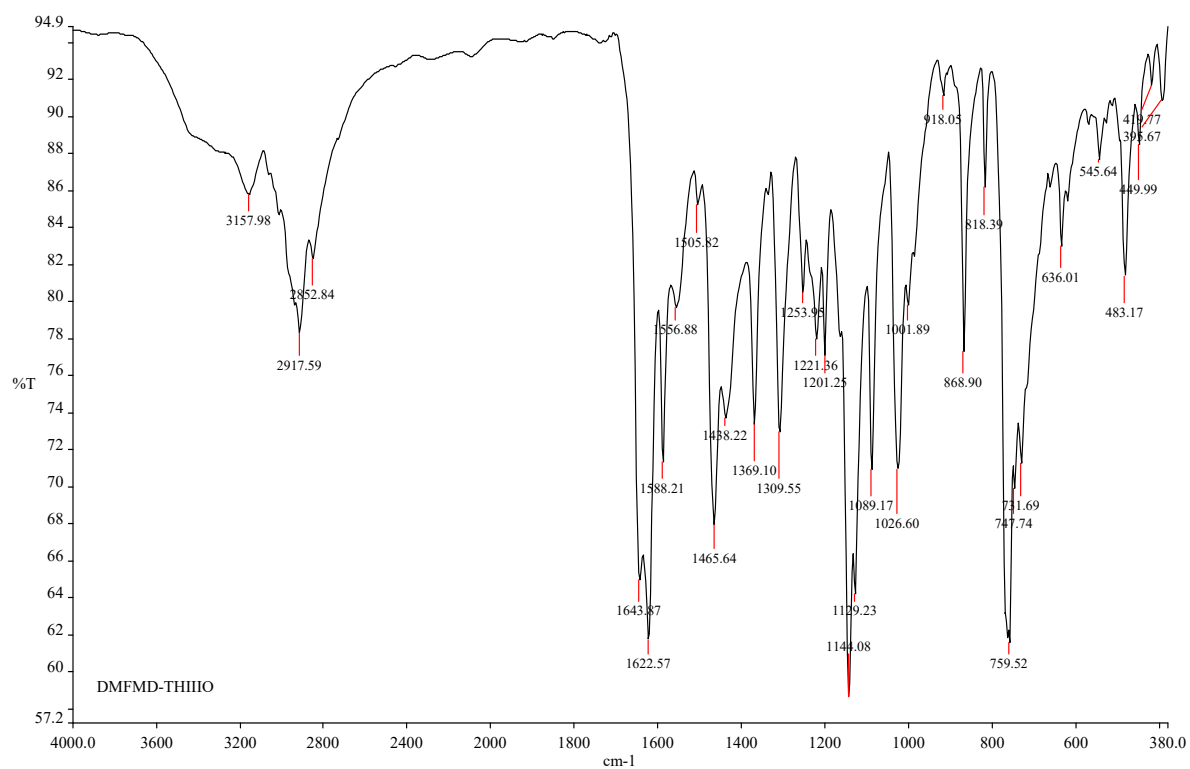

Figure S17: IR Spectrum for L1.

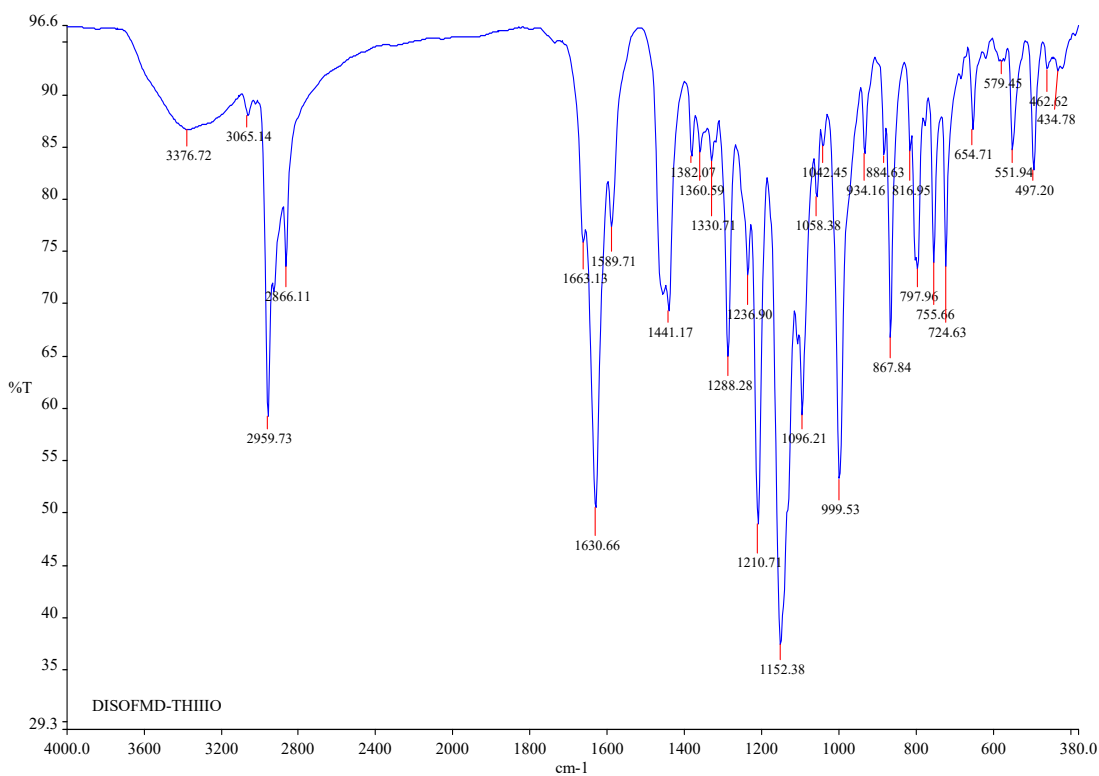

Figure S18: IR Spectrum for L2.

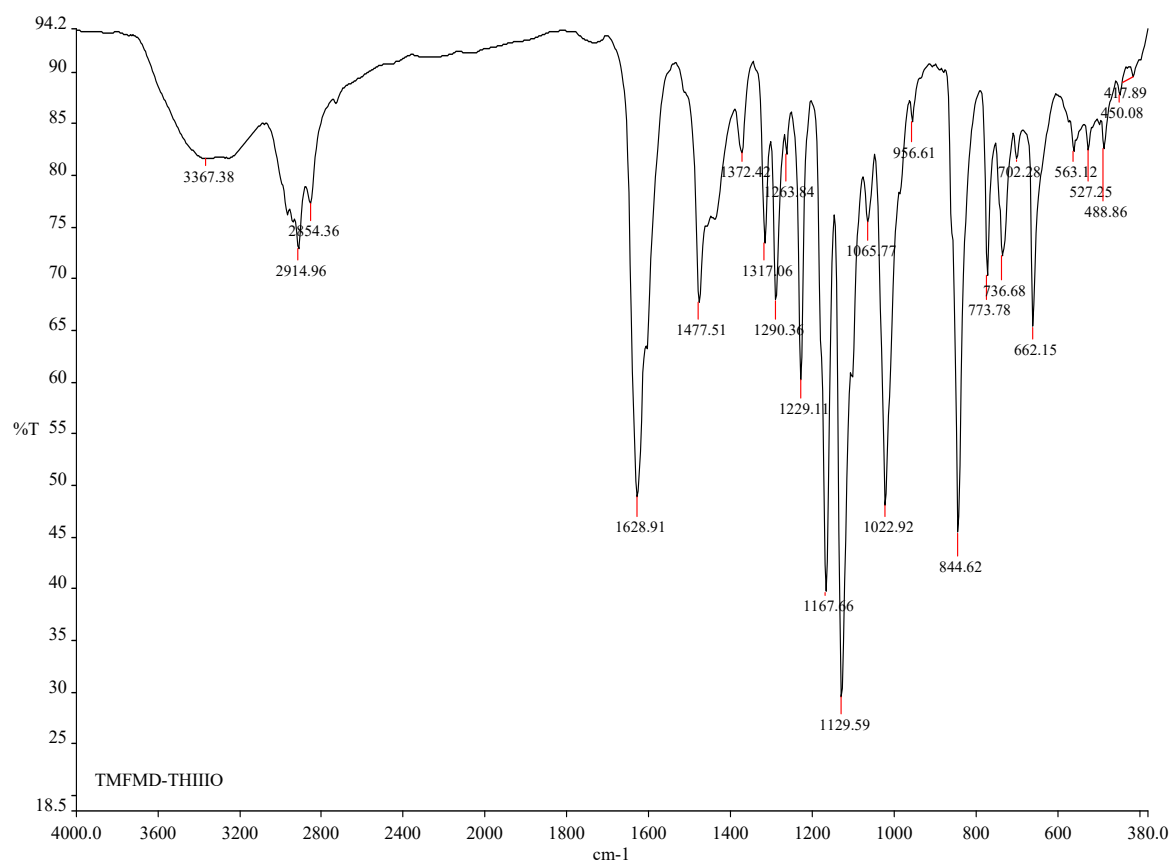

Figure S19: IR Spectrum for L3.

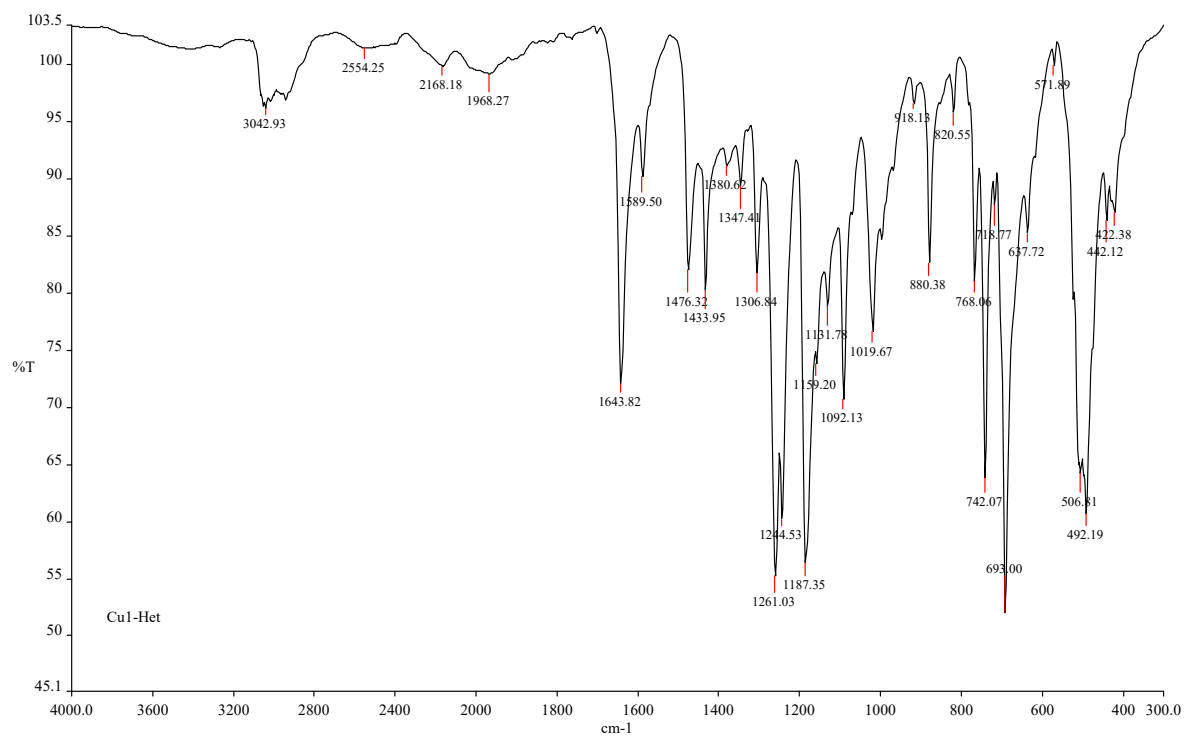

Figure S20: IR Spectrum for 1.

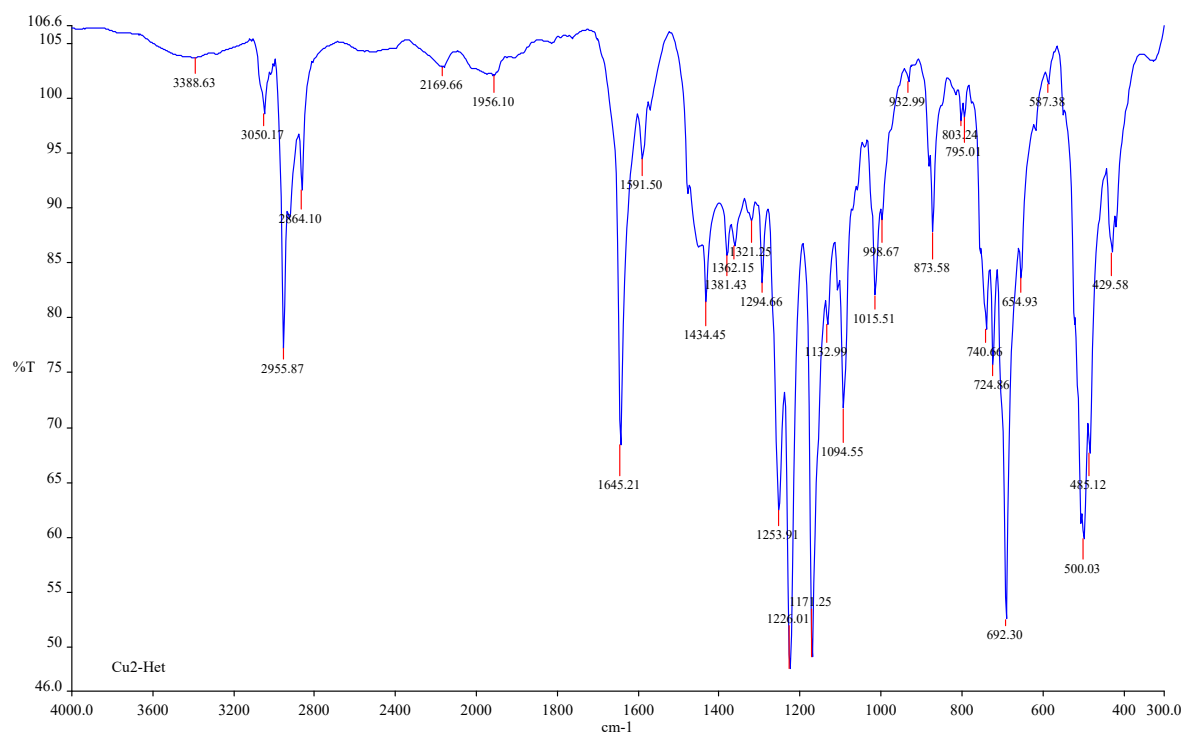

Figure S21: IR Spectrum for 2.

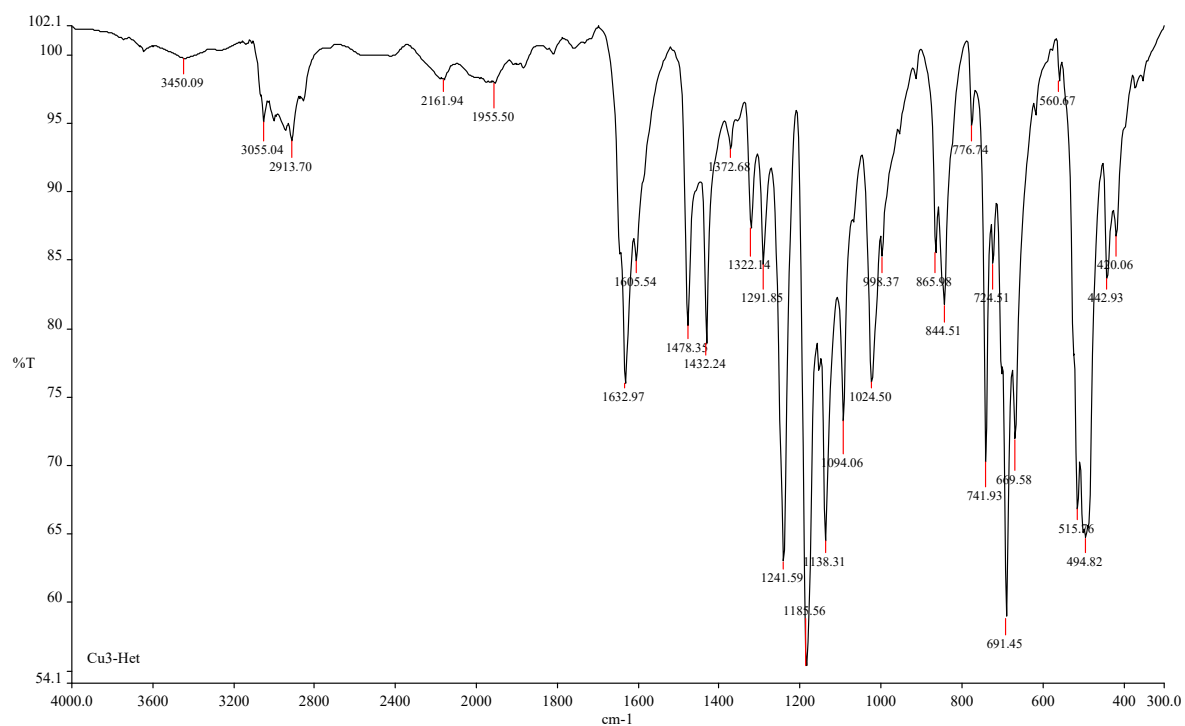

Figure S22: IR Spectrum for 3.

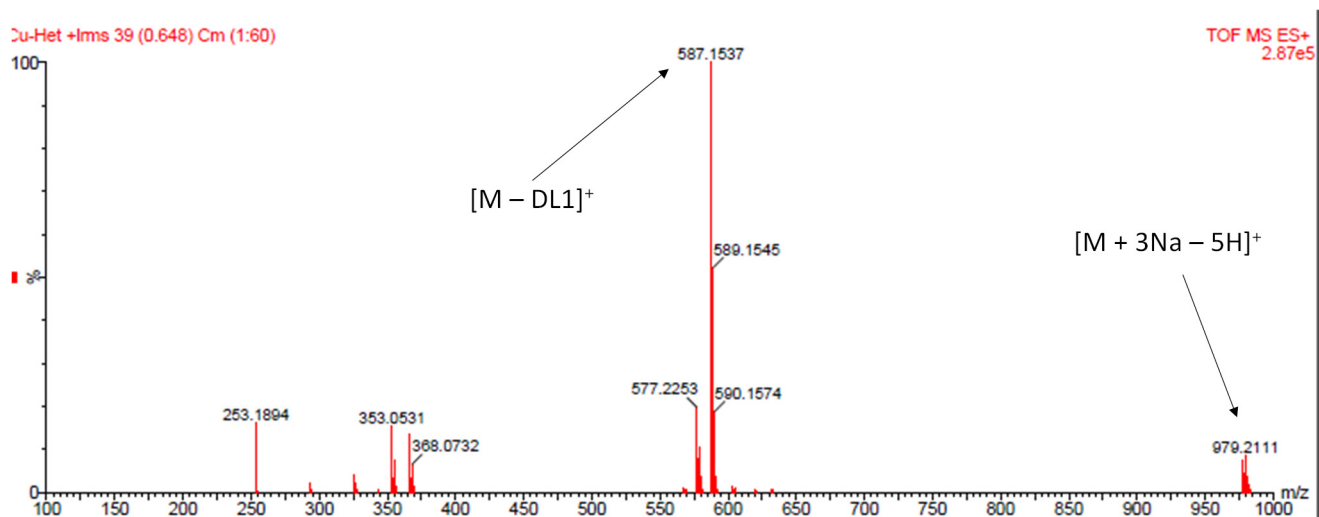

Figure S23: Mass spectrum for 1.

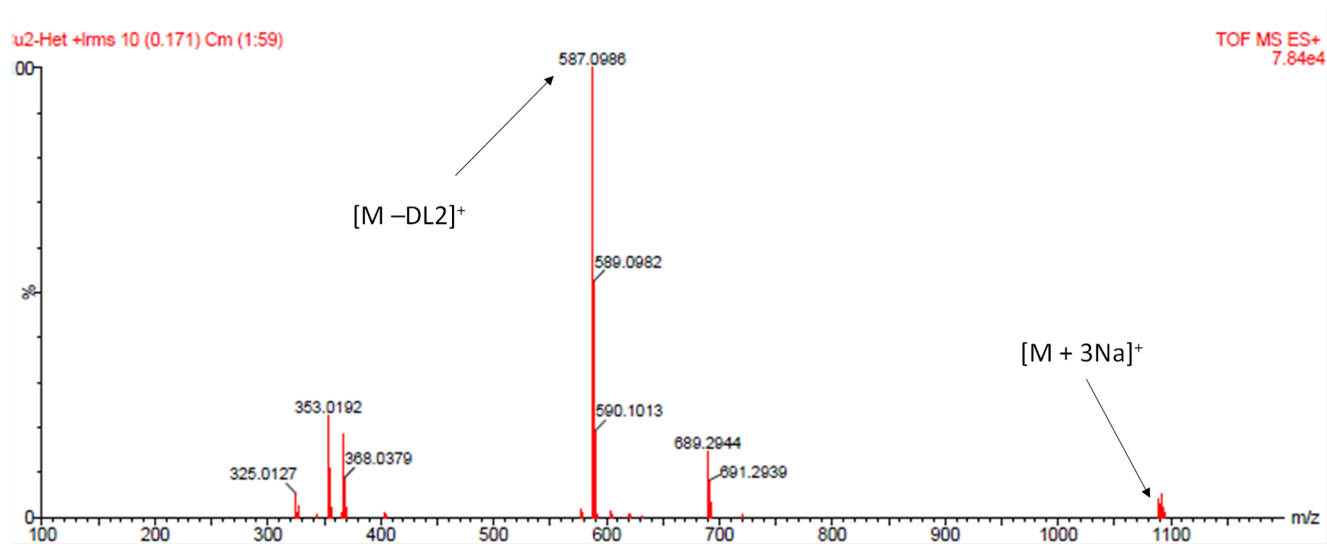

Figure S24: Mass spectrum for 2.

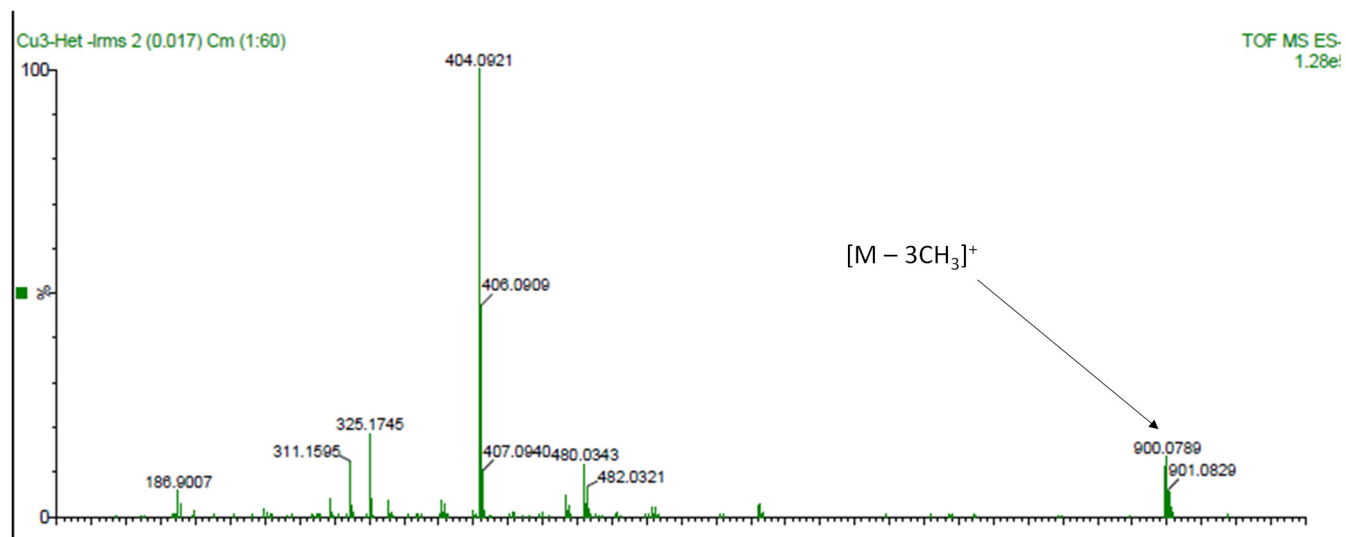

Figure S25: Mass spectrum for 3.
